# Supplementary material for: Transposons Hidden in Arabidopsis thaliana Genome Assembly Gaps and Mobilization of Non-Autonomous LTR Retrotransposons Unravelled by Nanotei Pipeline
Source: MDPI journal article supplement (doi:10.3390/plants10122681), 2021-12-06
Supplement: s1 [file s1]

Supplementary File S2: Sequence of contig assembled from ONT reads aligned to the TEI region on Chr 4 (3,464,984..3,465,035). The inserted TE element is colored by yellow:

>contig\_chr4\_TEI

CCTTGTTGATTGCACTTTTATTTACGCCTTATTTGCATCCCTATTTGTATCCCCTGTTTA  
TTGCATTTAGGTTACTTAATTTTGCTGCCTGTTGGTTCTACTCGACCCAGTGATCGAGTA  
GGGCTCTTAAGTCTTATTTTTACTTGTTGAATCCTGACCTAGGATTGTTACTAGAAAC  
CCACCATCATTATAATATGGCTTGACTTAGTTGTTTTGTACACATCTTGATTGCTAGCA  
ATACAGTGGACTAGATTGACATCCTCTATAACTGCAACGACATGTTTGTGTTTTAGGAGA  
ATTGAACTGAATCACACATTCACCATAAGCAGACCTTAAAAACCTGCTTATCAATTTGGC  
GGCATTGCCAATTCATTGTTGCATTGTTACATTCAAGATATCAGAACTTTTAAGATCAA  
GTTCTTTTACATTTATCAAGTTACTAACTCATCATTTTCGTCTGCTTGTTTTGTGGTATA  
GGTACTAATCTTTGTGCATGCAAACTCCATCCAAAGTTCTGCACAATCAAGACAGTGGA  
CTAGATTGACATCCTCTATAACTGCAACGACATGTTTGTGTTTTAGGGAATTGAACTGAA  
TCACACATTCACCATAAGGAGACCTTAAAAACCTGCTTATCAATTTGGTGGCATTGCCAA  
TTCATTGTTGCATTGTTACATTCAAGATATCAGAAACGTTTAAGATCAAGTCTTTTACA  
TTTATCAAGTTACTAACTCATCATTTTCGTCTGCTTGTTTTGTGGTATAGGTACTAATCT  
TTGTGCATGCAAACTCCATCCAAAGTTCTGCACACCTACTACCATTCAGAGACACAATT  
GACAAAATAGCTCATGAGTTACAAGAAACCAAAGTAAAGGCAGCCTGTGATCAGCAAAGA  
CCATCTGCTATGGATTAACAGAACAGACCAGTTGATGTTCAAGACCCACCTAATGTTGAT  
CAACCAAGAAACATTGGTGCTGGTGATGCCCAAGGAATCATCACCAAGACAAGGGATAG  
TGCCACCACAGTCCAGAACAACAACCTTTGAGATCAACAGTGGTCTCATCTCCATGATCC  
AAGGAAACAAGTTTCATGGTCTACCTATGGAAGACCACCTGGACCATCTTGACAGCTTTG  
ATAGGCTTTGTGGCCTTACCAAGATCAATGGTGTCCTGAAGATATGTTTAAGCTCAGGT  
TATTTCCCTTCTCTTTGGGAGACAAGGCACACCACTGGGAGAAAACCTTACCCCCAACT  
CCATCACCTCATAGGACGATTGCAAGAAAGCTTTTCTTGCCAAGTTTTCTCTTAACGCT  
CGCACCGCTAGATTGAGGAACGAGATCTCAGGTTTCAACCAGAAAAATAATGAACTTTTC  
TGTGAAGCTTGGGAGAGGTTTAAAGCTACACCACTCAGTGCCCCCATCACGGTTTTAAG  
AAGGCTTCATTATTGAGTACACTCTACAGAGGAGCCTTACCAAAGATCAGAATGCTACTT  
GACACCGCCTCCAATGGAACTTCCTGAACAAAGATGTAGTAGAAGGCTGGGAGTTGGTT  
GAAAATCTAGCACAATCTGATGGGTGCTACAAAAGACTATGATCCCTCAATCAGAAGAAC  
TGGAGGAAGTGAGGACAAACAGAGCAAGGATATCAAGGCTCTGAATGAAAAGTTAGACAA  
GCTGTTGCTGGTTAGCAGAAGCAGATAAATTACATCACTGATGAAGAGCACTTCCAAATG  
CAAGAAGGGGGAATGATCAAACTGAAGAGCTGTGCTACATTCAGAACCAAGGAGGGTTTA  
ACAAGGGCTACAACAATAAGCCCAACCCAAACCTCTCCTACAGAAGCACCATGTAG  
CTAACCCCAAGATCAAGTGTATCCACCACAACAGAATCAGTCCAAGCCTTTTGTTTCAGTA  
CAACCAAGGTTATGTCCCTAAACAACAGTTCAATGGTGGCTACCAACAGCAGAATCCACC

ACCAGGGTTCACTCAACAACCACAACAAGCCCTAGCAGCCCAAGATCCTGACACAAAACG  
AATGCTTCAACAAATCATCCAGGGTCAAACACTGGAGCTCTAGTTCTGGAAGAACGATT  
GGCTGAGATTAATAGTAAAGTTGACTGTTCTACAATGAGTTAAGAAGCAAATATGAGGA  
TCTCACATCTAAAATGACATACATGGAACGCCAAGCTGTTGCCAATACCTCCTCAACGTA  
TCCAGGGCAACACCCAGGAAAAGCCATTCTAAATTCCAAGGAATATGCACATGCAGCCAC  
ACTCCGTAGTGGAAGGAAATTGATCAACAACCAGCCAACAGAAAAGATCACTTAGGACAG  
TGAAGTTCAAGAAGGGAGGACCAGCATCAAAACGAAGTTCAAACCGATGAACCAATTAAG  
CTTGATCAGACCTTCAGACTCACTCAACCTCTACTCGATCAAGCAAAGCCAACTTTTGAG  
GAAAGGAAAGCTGCGGCTACAGAGAAAAATAAAGAATTTGCTCCGCCACCCTTCAAACCG  
GCTATGCCTTTCCTAGGAAGATTCAAGAAGGAATTAATAGAAAAATACAAAACCTCTTTT  
GATAAGCAACTAAAGTAGATTGAGCTAAGAATACCATTAATGAATGCTTTCACGCTCATT  
CCCACTCCCAAGTACCTCAAAGATCTGATTATGGAAAGAATTAAGGAGGTACAGGAA  
ATGGTGGTAATAGGCCATGAATGCAACGCTATCATCTAGAAAAATATAATACCAAGAAAG  
TTAGGAGATCCTGGATCCTTACCCTACTTTGTTTAGTAGGACCATTATCTTCAATAAT  
TGCCTATGTGATTTGGGTGCCTCAATCAGCCTCATGCCCTATCTGTAGCCAGAAAATTG  
GGTTTTAATAAATACAAGCCCTGCGGTATCCAAGTATAGCTGACAGGTTAGTCAGA  
ATACCTCATGGAGTTCTCGATGACCTGCCTGTAAAGTCAGATCAATAGACATCCCTACT  
GATTTGTAATTTCTGGAGATGGATGAGGAGCCAAAAGACCCATTGATCCTAGGAAGACCA  
TTCCTAGCTACTATAGGAGCTATCATCGACGTCAAGAAGGGAAAAATCGACCTAAACCTG  
GGGAAGTAGATGAAAATGACCTTCGACATTAACAAAGCTATGAAGAAACCGACAATCAAT  
GGATAAGTCTTTTGGATCGAAGAAATGGATAGATTAGCTGACAAATTACTGGAAGAACTT  
ACAGAAGGAGATCACCTAGCAAGTGCCTTAACCAACGATGGAGAAGAAGGGTACCTACAC  
CTAGAAACCAAGGGTACAAAGAGTATCTTGACGCCACATACCAATGGAAGGACCAGAA  
GTGTTTGAGGAATTGATCGTTCCTCAGAAGAAACAGTCTCAGGATGCTTCATGTGCCTA  
ATTGTTGAAAAACAACTCTACTGAGATGCTCGACCATGGAGGGGAGAATATAAGTTCA  
TATGACTAGTCAGAACTCAAAGTTTTAAAGGTTGACCTTAAACCTCTTCCAAAAGGTTTG  
AGGTACGCGTTTCTCAGTCAAATGATACTTATCCCGTCATTATTAATGATGGACTGAGT  
GTTGAACAAGTGAACCAAGTTGTTGAATGAACTTAGAAAGTATAGGAGAGCAATTGCGTAT  
TCTTTAGCTGATATTAAAGGAATTTACCTAGTTTATGTACTCATAGGATCCATCTTGAA  
AATGAATCATATACTAGTATTGAACACAGAGGAGATTGAATCCAAATTTGAAAGATGTG  
GTTAAAAGGAAATTTTAAATCGCTTGATGCTGATATAATCTACCAATTTCTGACAGTA  
CATGGGTCTCTCCTGTGCATTGTGTTCCCAAGAAGGGAGGAATGACTATAGTTAAAAATG  
ATTTAGATGAGCTCATTCCCACTAGAACTATAACAAGACATAGAATGTGCATTGATTACA  
GGAAACTAAATGTTGCAACTAGAGAGGACCATTTTCCTTGCCATTCATTGATCAAATGTT  
AGAAAGGCTAGCTAACCATGTTTATTACTGTTTTCTTGATGGCTATAGAGGTTTCTTCA  
AATTGCAATTCGCCCTAATGATAAAAAAAAACCACTTTCACCTGTCCCTATGGAACCTTT

GCTTATAAGAGAATGCCTTTTGGTTTATGTAATGCTCCTGGGACTTTCCAGAGAAGCATG  
ACTTCGATATTCTCGGATTTTATTGAGGAGATAATGGAGGTATTCGTGGACGATTTTCA  
GTCTATAGATCCTCTTCTCCTCATGTTTGTTAACTTGTGCAGGGTTCTAGAAATGTGT  
GAGGAAACCAATTTGGTACTCAACTGGGAGAAGTGTCACTTCATCGTTCAGGAAGGAATT  
GTGCTAGGGCATAAGATTTCTGGTAAAGGAATTGAAGTTGACAAGGCAAAATCGATGTCA  
TGATTCAAGTGCACCCCTAAGACAGTTAAGGATATCAGGAGCTTCTCGGCCATGCAGG  
ATTTTACAGGAGGTTTATAAAAGATTTTCAAAGACTGCTCGACCCCTAAATAGACTGCT  
GTGCAAGGAACTGAGTTCAACTTTGATGAAGATTGTCTCAAAGCTTTCATTTGATAAA  
GGAAGCATTGGTGTCCGCCCTATCGTTCGAGCACCCAACTGGGACCACCCATTTGAAATC  
ATATGTGACGCATCCGATTATGCAGTTGGAGCTGTCTAGGCCAAAGGATTGATGGCAAA  
CTTCACGTCATCTACTACGCGAGTAGAACGATGGACGAAGTTCAAACAAGATATGCAACC  
ACAGAAAAGGAGCTATTAGCTGTTGTTTTCGCCTTTGAGAAATTTAGAAGTTATTTGGTT  
GGTTCAAAGTGAAGGTCTACACAGACCATGCAACACTAAGGCACATCTATGCCAAGAAG  
GAAACCAAGCCAAGACTTCTAAGGTGGATATTGTTGCTTCAAGAGTTTGACATGTAAATC  
ATTGACAAGAAAGGTGTTGAGAATGGAGTTGCAGACCATCTCTCCAGGATGAGAATTGAA  
GATTCGGTCCCGATAGACGACACTATGCCTGAAGAACAGCTTATGTTCTACGACCTTGT  
AACAAAAGCTTCGATTCAATGGACATGCTGGAAGAAGCATATGGAGTTGAAGAAGAAAAG  
CTGCCCTGGTATGCAGATTTAGTCAATTATTTGGTAAGTGGTATGATCCCCTAGAGTTTG  
GATGCATATAAAAAGAAGTTCTTTAGAGACATCCATCATTACTATTGGGATGAGCCGTAC  
TTGTATAAAAAGGGGAGTGATGGGCCATTCAGGAGCTGTGTCTCTAAAGAGGAAGTTCAA  
GGTATATTGGGACATTGTCATGGATCCACCTATGGAGGGCATTTCGCAACCTTCAAACT  
GCTTAGAAAATTTTGCAAGCAGGTCTGTGGTGGCCACGATGTTTAAGGATATTCAAGAA  
TTCATAGCGAAGTGCGATCCATGCCAAATAGTTGGGAACATATCCAGAAGGAATGAGATG  
CCACAAAATCCAATTTTGGAGGTAGAAGTTTTTGATGTGTGGGGAATAGACTTCATGGGG  
CCGTTCAACCTTCTCATATGGAAATGCTTATATCCTGGTAGCAGTGGATTACGTCTCC  
AAGTGGGTGGAAGCAATAGCAACACCAACCAACGACCACAAAGTAGTCCTGAAAATGTTT  
AAGTCCGTTATTTTCCCAGGTATGGTATTCCGAAGGTGGTGATAAGTGATGGTGGCTAA  
CATTTATAAACAAAGTTTTGAAGGTCTATTAAGAAACATGGGGTTAAGCATAAGGTTG  
CCACTCCTATCACCTCAGACCAGTGGCCAAGTAGAAGTGTACATACAGGCAGATCAAGGC  
TATAGTCACAAAGGTTGTTGGTGTCTCAAGAAGGGATTGGTCAGCTAACTTGATGAGAC  
TTTATGGGCCTATAGAACCGCATACAAAACGCCTATTAGGAGAACCCCATTCGAGATGCT  
ATATGGGAAATCTTGTCATCTACCGAGTTGAAGTGGAAATATAAAGCCATTTGGGCAACCA  
AACTTTTGAATTTGGAAATCAAGGGAGCTCAAGAGAAAAGAGCAGTCGACCTGCATGAAC  
TAGAAGAGATTAGGCTGGAAGCATATGAGAGTTCAAACATCTACAAAGAAAGAACAAAAG  
CTTTTCATGAAAAAAGATCTCTCCAAAAGATTTCAACATTGGAGACCAAGTTCTGCTTTT  
GAACTCCAACTCAAGTTGTTTCCAGGAAAGCTAAAATCCAGGTGGTCTAGGCCTTTCAC

CATCAAAGAGATACTGCCATATGGGACAATTACTCTTACTAAGAAGGGAGGTTATGAATT  
TACTGTGAATGGGCAGAGAGTTAAGCGTTATATGGCAGATTGTCCTATTCCTGAAGGAAC  
TACAGTTGACCTCCAGGAACCCATCAATGCCTAAAATAGTAAGAAGTCTAGCTTAAGACT  
TTAAACTAGCTCACTTGGAGGAAATCCCATGCCTATATCTGTACAGATTTAATTTTGATA  
TTTTGATGTGCTTTTTAGTGTTTTTGGAAATTCAGGAAATAAATCAGGATTTATGAGCTGT  
GAACTCTGTGATCTAGAAATATTTGCAACAGAAGCAATTCTACTCTATCAATTGGTCGAG  
TAAAATTGCATCACCATTGTACTCTATCAATTGGTCGAGTAAAGCAACTAAACGACCAAG  
CTTGATGATATAGTGGCCCACTTGCTCCCCATCATTCTATTACTCGGTGGACAAAGCCT  
TTACCCATCATGCTCAATCACTATTTGGTCAACACCCTTATCCCAACAAAGAAAGCATAG  
GAGACCATCCTCCTCCACTCATTCAAATCGAAACCTAAAGATAAGTTATCAACTCTCTCT  
CACTTTCTTCTTTGTGCGCACTTCAATACCATCTTCTCATTGTGTTTTCTGCTTCACACA  
ATCTCGAAAATTTTAGTTTTTCAGCTTCTCTAAAGAAAAAATCACTTGCCCCCTATTTCA  
CTCGATCAAAATCGCAAGTATTTTTCTTTGTTTGAGACTTATCTACTAAGGTTTAGTTTT  
GATTTTTGAGAGTTTAGCTTCACCATGAGTTCAAACAGCAACGAATCCTTCATGAACGCC  
GATTTCAACGTGGATGAGGCCGAATCTTGGTATACTAGGCCTGAGAGGGAGATGGAAGAG  
TATAGGCGGTTCACTCAACATGCCACCAAGATCCTAGCTCGTGATAGAAGAAGAGAGGAA  
ATTGCAAGAGGTAAGAGAGCTATGGCCGAAGAGAGAAGTCTCGTCGATGAATACCTTGGG  
GGATGAAGATTATGTCCCTGAAATAACTCCAAGACTCACTAAGTCCTTGATGAAGAAGAC  
TAAGCTATCACCGGATGGATACTATGAGCTTTTGGCAGCTCACAATTTCCATGGGACTCG  
ATACCCCACTCTGAAACCATGAATGAGCTTGGGATAACAGAGGATGTCGAGTACCTCTTT  
GAAAAGAGTGGTCTTCTGGGTCTCATGTCCAACCCTCACTCAGCCTACAAAACAGAGGCG  
CTTCAGTTTATTGCTTCGCTGGAAGTAAAGTTGTTTCAGGGGCTTTCTAGCCATGAAGCA  
AGAGAAGAAGGGCTTGGGTATATCACATTCGAAGTCTATGGAAAAGACTATGTTTTGGCT  
ATCAAACTCTTGAGGATATGTTTCGATTCCCTAGAGGGACTGATGTTAAACCAAGTTC  
AAGAAAGAGGAACTTTTCGGATCTTTGGGTAACAATAGGTGATGACGCTGTATTCTCATCC  
TCATGGGCCAAGAGCAACGCAATCCAAACCCCTGCATTGGTACTTCCAGAAAGCAATGG  
CTAACGTCCTCTACGCAAGGGAGAAGACCGGACCGATTAACAATGGTGAGATAGAGCTGT  
TGGATATTACCCTAAAAGATATCCTAGTCGACACCAAGAACAAAGTGCC

TATGAAGGGTG

ACACCTGTTGGTTTATTGAGAGAAAGAAGAAAAACAGAGTAAGAGAGACATATCTCTCT

CTTGTGAAGAAGACAAGAACAAAACCTTTGTTTTATTGAACTGAACTTGTTAATCTTTA

CATGACGATACAAGGTGTTTATATAGAAAACAAATAGACACAACAACTCAATTAGTTCTG

TCACTTCATACTTGTGTCTCTTTCTACTTGTGCCTCTTGAGTGAAACAACACAAACTTAC

AACCTTTAACTGAAAACCTCAATTACCGACCAACACTCCCCTTAATTGAGTTTCGGTCTTG

CACTTAGCTTCCTTCTCAGTTTGTCAAGTTGACCTTGTTTACTTCTTCTCCCTTGCA

AGTAAATCATTTGTGTTTTCTCCATCTCAATGGAAAACCTTATGCTTGATCTTAATATC  
CTGTATACTTCTTCCTTGAGGATAATTGATGAGACATCTGACACTAGAAACACCTCTTTG  
ATGATCTTCTCCTTGCGTTGTCATCACTTGGATATTTCTTTTCCATGTCTCATCATT  
CATGATGATGATATTTCTCAACTTGAGGTTCTTACCACGTGCCTTGGCTTGTTACACA  
CAAAGCACCTTCTTGTTGCAACTCGTATTTGACGTTGCACACTTTTGAGATTTCTCTTTC  
CCACAACGCTTCTCGTTTGTACCTTCAAATTTTTTTTTTTTTCACGTGAGCTTGTACAG  
TCATCTCCGGTTGTTCTCACAACCTTTTTTCCACTCACTTTCTTTTAAATGAGATTACTT  
CTGATTTCTTTTGGTGTCTCTTGATCACCAAATCTGTGCGTGAACCTCTCCACGTCTT  
CTTCGGTGTCTTCTTTTGATCACCATAACGTCTCCATGACGTCTTGTGCGTGAATCTTCT  
TCACGTCGTCTTTGGTTTACTCTTCAACCGACTTATGCTCCATTTTTCTCCGAGGTAAGC  
ATCCTCTTGCTCCATTTTTCTCCGAGGTAAGCATCCTTATGGTGTCTCTTTTGAT  
CACCACCACGTCTTTTGCACGTCTTGTGCGTGAAAATCTCTTCACGTCTTCGTCGGCTAC  
CTTTGCAACCGAACTGAACTCTGCTCCCTCTCTTAGGTAAGCAGCTTCACACACGTAA  
GCAAGCTAACATCCCTGTGTTGCTTTCTCCAACAATCACCTCAATGTGATCGTCACACGT  
ACAAATGTCACACCATTCTTGGCCTTCTTTTGACTTTTGTGCGCCCGTTTGTTTCTTCC  
TTTTGAAGCAAACCTTTCTCCACGTTTTCGTGTTGTAGTCATCTTCACAACTCAACACAA  
CGTTTTGATAATAAGCCTTGCTCTGTTTGTACAACAGCGGCTTTGCCGTCTTGCGCTTC  
ACCAAGACGTTGTTGAACAAATTTTCAAAACTCTCCTTCCACAACCTCAAATCCACATTC  
GTTTTCTCCATTGCCTCTAGAGAAGATTTCTATCTTCTTCATCGCTTTTGAGCCTTCC  
TCTTGAAGGTACTTCATGTGAATGTGTTGTGAAAACCTGATGGTACTCTCTGTAGTTACC  
ACCTCTTATTTCTTCTTCTCCCTCTTCTTCTCCTCTTCATCTCACCATAGATTTGTTG  
TCTCCATCTCTTTTTCTTTTCGCAGCAGAACACATCTTATTTTTGTAGAGACAACCAA  
GGACAACCATCGGCTCTGATACCATGTTGGTTTATTGAGAGAAAGAAGAAAAACAGAGTA  
AGAGAGACATATCTTCTCTTGTGAAGAAGACAAGAACAACCTTTGTTTTATTGAAAC  
TGAAACTTGTTAATCTTTACATGACGATACAAGGTGTTTATATAGAAAACAAATAGACAC  
AACAACTCAATTAGTTCTGTCACTTCATACTTGTGTCTTTTCTACTTGTGCCTCTTGAG  
TGAAACAACACAAACTTACAACCTTAACTGAAAACCTCAATTACCGACCAACAACACCAA  
CGACGCT

TCACCATCAATGCGTTTATTGAATCATCTTTGTGGTTTCAGGAAATGGGCACT  
AGCAAATAAGCAGAAGAGAACCATTTCTATAGGAGGGGTGATAACACCTACACTAATGGC  
TTGTGGAGTGCCACTTCAGTCGACTCCCTTTGCCCTAGATGGTGAGATGGGCTTGTTT  
ATTGATCATCAGAGTCATGAGGGGATGCATATTCTCAAGTTTCAGCATAGAGCGGAAATG  
GATGGGAGGTTTCTCCTACCCAATAAGAGCTCACAACCATCACAGTGAGGGGTAACATC  
GATTTCAACCCGCTAATGAAGAACTCTTCTCATGGAACGAGCACCCCGACGAGAGAAG

CTCCAGACATTGAAGAAAGGGTTGAGAGTGAAGGAGAAGCTGAGAATGAAGAAGCAGAGG  
AGATGGATTGGGAGAACTACAATGCAAGTATGTTCCATTTTGAGGAACACAAACCACCAC  
CAAGAGTGAGTAAGAGTCTGACTGTTGCACATAAGAATATTGGTTTGATGAGTACTTGAA  
ATAAGTTTCAAGACAGGATGTTGGAAAAATGTGGCAAGGCCATAGCCGCCATTCAGGCTG  
TACTAAGCTTTTCATCTTCAGGCGCCACCATGGTGAGAGAAAACCGCCCTGGAGAAGTGG  
TTTCAAGAAGGCATAGAGTTTCACCTTCAAGACAATCTGCCTATGAGAAACGAGAGGTAA  
GTCGCCCTCAAGCTCCTGCACGACATTTCGTCTCATGAACACCGCGAGCAGAAAAGAAGGA  
GAAAAACAAGAATTGTTGCGCCAAGGAGCAAGGACCTTCTTATGTTGCGCAGAAGATCAC  
TCGACCAAGATACTCGACGCGATATCGAGCAGAGTGTGAGCAGGATCCGTGGGTTCCAGA  
ACGAGCAGAACGTCGAGCAAAATCAGTGGGATCAAGATGGGCAGTACTCAGGAATGAATT  
GGGATGCTTACTATGGCATCAACGAGCAGGAACCTTCACCTGAAAACCTGAGGTAACACCA  
CCTCTCTATTGTATATACCATAGCATCTTTTTATTTTTCTTTGTGTGATTGTGCTTTGG  
TCTTGGATTCTCTTCAGATTTTTATTACACAAGAGATTGTGTAATTTAAGTTTGGGGAG  
GGTTCAAGACATGTTAACTTTGTGTTCTCTTTCTTATTTCAAAATTTGCATCATCTAA  
GGCATAGAAAACAATAAAAAATTTGAAAATTTTTAGAAAATTATTTACAAAAAGAGTG  
TCATCTAGATTGCATATCATTTTAGGATTGTATATAGAGTGTTAGCATTTAGGATTGCTC  
ATTTGCATAGGGGATAATGATGATTTGAAACCGATAAGCATGTTTTGATTCAATAAAGTA  
AGTTCAATGCCAGGTTGTTAGTTCTCTGTTGTATAACCGATTGTATCTCTGAAATAAGA  
CTGCACCCTGCTTTGAATTTGTAACCTGATTATACTACTTTGATCGAACTTGCTTATTT  
GATGCCATTCCTATCTATTAGAACCTGAACTGAATTTGAAATTATCATGTCTATGCTTTG  
TTTATGAACTTATGGCTACCATATACATACTTGGATCATCTTATTCATTCATCACCCCTC  
TGTTAATCCAAGTAGTTGTCTCTCATTTTTAGAGCAGTTTTCCGTACCCTTAGTCTAGCC  
TTATTTCAAGGCAAAGATCATTTGTGTGTGATTGTGAGGTCTTTTTGGATTGAGCTTGGT  
ATAACGTGTTAGGTATGAGCCGACAAGAGCAGTTTTTCATGTATACCTAGCCCACACTTT  
TTGGGTACCTAGGACTACGTGGAGACTTGTATTTGCGATTGAGAATGTGAAAGGAATGA  
ATGGGAATGAGAGTGAGAATGAAAAAAAAAAAAAAAAAAGAGAGTAAGAGTTTAGAGTTC  
TAAGGGGATACAAAAGTGTTAAGTCTAGTAAATGTTTTGAATTCAAAGAAGTTAGACAT  
AGTGATTCAAAGAAAAGGGTAAAACGCCCTATGTGCTAAGATTAGAAGAAAAGCCTTAAG  
TTTGTCAAAGTATAAAACCAAACCCGCTAGACTCTTAAATTGTTTCAAGAGAACCCTGTA  
GAACATAAACCAAAAAGAGAGAAAGAATGATAAAAAGGGTAGAGTTAGGACATCTATGGG  
AATGGGATCAGCTTCTGAGCTATCATACTGTATCATTGGGTAGATGGGAGTCTGTTCTTG  
TATGTGTCTGTTGGCTTTTACCTTTAGCATTCTACTGAAGCTCAATCTTTTCTCTAAGGG  
TCCCTGTACTCGACCAAACCATTAGAGGGACCATTTTTGTCTCTTGGCCTAAGCCCAA  
ACCAAGTGAGTTCATAACCATTGCATTGTTTGATCCACTATCCGTGCTTAATGAATGTTA  
AAGGGAATTGGTTGATGTGAATGCTTGAATAGATTAAGGCAAGTTGTTAGGTTGCATTGT  
GACGAGTATGGCTAACATTTTTAAGTAAGGGTCTATCATCTTGCAACCTAGAATTAGCTA

CCTGGACATTGAGCTTACCCATTTTATAGGCATGCTTCGGTTTTTGAATCCCCACCTTCA  
AACCTCTCCTTCAACTTAAGATTTTTTGTCTTACTTGAGGGCAAGCAAGAGATAAGTTTGG  
GCAAGCAAGAGATAGGTGTATGTTTATCATCATTTAGCTTTCGATTGCTCATTGTATCA  
TATCATTTTGCACCATTTTAGCTTGTTTTGCATACTGATATCTAGGATCATCTTGCATTCT  
GCATTGCATGTTTTGGTGTGTTTTAGGTGTAAAAGGAGCTTAAAAGGACTCTACTCGATC  
CATTCACTCTATCCAGGCAGCTACAGAAGAGGCATCATTCTACTCGACCTCTTACTCGA  
TCCAGGATGCTATAAAGGAGGCTGCAGTTCCTCGACCTCCTACTTGACCAAGGCAACC  
TCTAATGAAGCAGCAGATTGATCTACTTGCCCTCCTACTCGATCCATTTACTCGACCAAG  
GGTGACCATCTCTACAAGAGTTGTTGAGCTATCAAAGCGTCCTCGAATCCTCCTCATTCC  
CCTCACTCACTAGACATCTGAGCATACGGATATGAGAGGATGAAGCATCTACTCGACCAAT  
TCATCACTCGGAGGATAGACACAAAGGCGTAGACTTTGTAGCACCTCTTACTCGATTCT  
CCAAGGTCGAGTATTCGCCCAAACCGCCTCAAGTCTCTTGCTTCTACTGAATCCAGGGT  
TTCAACATTTTAGTATAAATAGATCACTTTGGGATTTGTCCAAATGATCTATGCTTTATC  
TTTCAGTTTTTCTTTGTGTTTATGAATCTTGAACTTTAATTACTCTTAATCTATTTCTG  
TTTTGCATTTGATTGTTTAAAGTAAAGTTGTTTAGCTGTTTAGATCTACATTTTGGTATG  
ATTTTAGTAATTTCTCGGTTTGTGTTCTTGATAATGTTGCTTGAGTAGTGATTAGGGTTT  
TTGAGGATGGATTAGATTAGGGTAATCTCTAAGTTAGTTAGGTGGTTAGTGTTTAGGTTT  
ATACCTTCTGGATTTGCTTGCCCCCTATGCGATTTTCGCTGGCTAATGTGGAGATTCTGA  
TCATAGACGTCCAGCGTCCAAAAGACGTTCAAATGGATGTCTGACCTACGAATTCTAGAG  
ATACGTAGCCTCGACCAAGGGATTGGCTTGCTGCCTATTGGCTTTGGTAGATTGTTTCT  
TAAACCCTACTCTGCTATGTTTCATCAACGAGAGTTGAGATTAGGAAATGGTAGAGTTAT  
GGGGGTCTCTGTCACGAGAGTGAATTGACCCGGTTTTTGAATCTATCGTCATGGGTATCT  
ACCTTTCGCCTATTAGCCATTTGATGAACCCTAGAGTTGCCCTTATCAATGAATCCATCC  
TTAGAACTTCTATTAGATTTATTTGTA
